# Supplementary material
Source: publisher site journal article supplement (https://www.spandidos-publications.com/8249/downloadSupplementary)
Supplement: Supplementary file 1 [file downloadSupplementary]

**Table S1.** List of tested genes.

---

*ANKRD26*  
*ASXL1*  
*BCOR*  
*BCORL1*  
*BRAF*  
*CBL*  
*CEBPA*  
*CSF3R*  
*DDX41*  
*DNMT3A*  
*ETV6*  
*EZH2*  
*FLT3*  
*GATA2*  
*IDH1*  
*IDH2*  
*JAK2*  
*KIT*  
*KRAS*  
*NF1*  
*NPM1*  
*NRAS*  
*PHF6*  
*PPM1D*  
*PTPN11*  
*RAD21*  
*RUNX1*  
*SETBP1*  
*SF3B1*  
*SRSF2*  
*STAG2*  
*TET2*  
*TP53*  
*U2AF1*  
*WT1*  
*ZRSR2*

---

**Table SII.** Comparison of clinical manifestations and laboratory features in elderly patients with *NPM1*-mutated acute myeloid leukemia stratified by CNA/CN-LOH status.

| Characteristic                                         | Overall (n=61)      | CNA/CN-LOH NEG (n=21) | CNA/CN-LOH POS (n=40) | P-value |
|--------------------------------------------------------|---------------------|-----------------------|-----------------------|---------|
| Age, years                                             | 72.97 (60-88)       | 72.76 (62-83)         | 73.08 (60-88)         | 0.857   |
| Sex, male/female                                       | 27/34               | 9/12                  | 18/22                 | 0.873   |
| White cell counts at presentation, x10 <sup>9</sup> /l | 61.23 (1.23-417.23) | 79.83 (1.23-417.23)   | 51.21 (1.27-206.45)   | 0.280   |
| Hemoglobin at presentation, g/l                        | 74.47 (35-111)      | 70.57 (35-111)        | 76.56 (50-106)        | 0.201   |
| Platelets at presentation, x10 <sup>9</sup> /l         | 65.65 (8-349)       | 61.57 (13-300)        | 67.85 (8-349)         | 0.707   |
| Bone marrow blasts, %                                  | 63.42 (20.00-97.00) | 59.00 (20.00-96.50)   | 65.74 (20.00-97.00)   | 0.359   |
| <i>NPM1</i> mutation type, n                           |                     |                       |                       |         |
| Type A                                                 | 47                  | 18                    | 29                    | 0.398   |
| Type B                                                 | 3                   | 0                     | 3                     | 0.545   |
| Type D                                                 | 3                   | 1                     | 2                     | 1.000   |
| Others                                                 | 8                   | 2                     | 6                     | 0.839   |
| FAB subtype, n                                         |                     |                       |                       |         |
| M2                                                     | 13                  | 3                     | 10                    | 0.521   |
| M4                                                     | 5                   | 1                     | 4                     | 0.651   |
| M5                                                     | 31                  | 12                    | 19                    | 0.474   |
| Others                                                 | 12                  | 5                     | 7                     | 0.803   |
| Previous hematological disorder, n                     | 15                  | 6                     | 9                     | 0.601   |
| Induction chemotherapy regimens, n                     |                     |                       |                       |         |
| Containing cytarabine                                  | 16                  | 4                     | 12                    | 0.356   |
| Containing demethylation agent                         | 35                  | 11                    | 24                    | 0.568   |
| Containing venetoclax                                  | 16                  | 6                     | 10                    | 0.763   |
| Others                                                 | 15                  | 8                     | 7                     | 0.076   |
| Complete remission, n                                  | 23                  | 7                     | 16                    | 0.610   |
| 1-year relapse, n                                      | 16                  | 5                     | 11                    | 0.756   |
| 2-year overall survival, n                             | 11                  | 5                     | 6                     | 0.488   |

All values are presented as median (range), except where otherwise indicated. *NPM1*, nucleophosmin 1; CNA, copy number alteration; CN-LOH, copy-neutral loss of heterozygosity; NEG, negative; POS, positive; FAB, French-American-British.

**Table SIII.** Comparison of clinical manifestations and laboratory features in elderly patients with *NPM1*-mutated acute myeloid leukemia stratified by CNA/CN-LOH status.

| Characteristic                                         | Overall (n=61)      | < 2 CNA/CN-LOH (n=40) | ≥2 CNA/CN-LOH (n=21) | P-value |
|--------------------------------------------------------|---------------------|-----------------------|----------------------|---------|
| Age, years                                             | 72.97 (60-88)       | 71.80 (60-84)         | 75.19 (61-88)        | 0.077   |
| Sex, male/female                                       | 27/34               | 19/21                 | 8/13                 | 0.482   |
| White cell counts at presentation, x10 <sup>9</sup> /l | 61.23 (1.23-417.23) | 66.84 (1.23-417.23)   | 50.82 (1.27-206.45)  | 0.459   |
| Hemoglobin at presentation, g/l                        | 74.47 (35-111)      | 74.36 (35-111)        | 74.67 (51-104)       | 0.948   |
| Platelets at presentation, x10 <sup>9</sup> /l         | 65.65 (8-349)       | 69.77 (8-349)         | 58 (11-169)          | 0.480   |
| Bone marrow blasts, %                                  | 63.42 (20.00-97.00) | 63.89 (20.00-96.50)   | 62.53 (20.00-97.00)  | 0.854   |
| <i>NPM1</i> mutation type, n                           |                     |                       |                      |         |
| Type A                                                 | 47                  | 30                    | 17                   | 0.838   |
| Type B                                                 | 3                   | 1                     | 2                    | 0.270   |
| Type D                                                 | 3                   | 3                     | 0                    | 0.545   |
| Others                                                 | 8                   | 6                     | 2                    | 0.839   |
| FAB subtype, n                                         |                     |                       |                      |         |
| M2                                                     | 13                  | 8                     | 5                    | 0.987   |
| M4                                                     | 5                   | 2                     | 3                    | 0.329   |
| M5                                                     | 31                  | 21                    | 10                   | 0.717   |
| Others                                                 | 12                  | 9                     | 3                    | 0.669   |
| Previous hematological disorder, n                     | 15                  | 9                     | 6                    | 0.601   |
| Induction chemotherapy regimens, n                     |                     |                       |                      |         |
| Containing cytarabine                                  | 16                  | 11                    | 5                    | 0.756   |
| Containing demethylation agent                         | 35                  | 22                    | 13                   | 0.604   |
| Containing venetoclax                                  | 16                  | 8                     | 8                    | 0.127   |
| Others                                                 | 15                  | 10                    | 5                    | 0.918   |
| Complete remission, n                                  | 23                  | 15                    | 8                    | 0.964   |
| 1-year relapse, n                                      | 16                  | 10                    | 6                    | 0.763   |
| 2-year overall survival, n                             | 11                  | 9                     | 2                    | 0.302   |

*NPM1*, nucleophosmin 1; CNA, copy number alteration; CN-LOH, copy-neutral loss of heterozygosity; FAB, French-American-British.

**Table SIV.** Comparison of genetic alterations in elderly patients with *NPM1*-mutated acute myeloid leukemia stratified by CNA/CN-LOH status.

| <b>Variant</b>   | <b>Whole cohort<br/>(n=61)</b> | <b>CNA/CN-LOH<br/>(n=21)</b> | <b>NEG</b> | <b>CNA/CN-LOH<br/>(n=40)</b> | <b>POS</b> | <b>P-value</b> |
|------------------|--------------------------------|------------------------------|------------|------------------------------|------------|----------------|
| <i>FLT3</i>      | 28                             | 8                            |            | 20                           |            | 0.375          |
| <i>FLT3-ITD</i>  | 23                             | 8                            |            | 15                           |            | 0.964          |
| <i>DNMT3A</i>    | 24                             | 10                           |            | 14                           |            | 0.338          |
| <i>IDH2</i>      | 17                             | 7                            |            | 10                           |            | 0.490          |
| <i>TET2</i>      | 19                             | 8                            |            | 11                           |            | 0.396          |
| <i>NRAS/KRAS</i> | 14                             | 4                            |            | 10                           |            | 0.838          |
| <i>PTPN11</i>    | 9                              | 4                            |            | 5                            |            | 0.760          |
| <i>CEBPA</i>     | 7                              | 3                            |            | 4                            |            | 0.683          |
| <i>IDH1</i>      | 6                              | 1                            |            | 5                            |            | 0.654          |
| <i>SRSF2</i>     | 8                              | 3                            |            | 5                            |            | 1.000          |
| <i>WT1</i>       | 5                              | 0                            |            | 5                            |            | 0.154          |
| <i>ASXL1</i>     | 6                              | 3                            |            | 3                            |            | 0.405          |

*NPM1*, nucleophosmin 1; CNA, copy number alteration; CN-LOH, copy-neutral loss of heterozygosity; NEG, negative; POS, positive; *FLT3-ITD*, fms-related receptor tyrosine kinase-internal tandem duplication; *DNMT3A*, DNA methyltransferase 3; *IDH1/2*, isocitrate dehydrogenase 1/2; *TET2*, tet methylcytosine dioxygenase 2; *PTPN11*, protein tyrosine phosphatase non-receptor type 11; *CEBPA*, CCAAT/enhancer-binding protein  $\alpha$ ; *SRSF2*, serine and arginine-rich splicing factor 2; *WT1*, Wilms tumor 1; *ASXL1*, additional sex combs-like 1.

Table V. Comparison of genetic alterations in elderly patients with *NPM1*-mutated acute myeloid leukemia stratified by CNA/CN-LOH status.

| <b>Variant</b>   | <b>Whole cohort<br/>(n=61)</b> | <b>&lt; 2 CNA/CN-LOH (n=40)</b> | <b>≥2 CNA/CN-LOH (n=21)</b> | <b>P-value</b> |
|------------------|--------------------------------|---------------------------------|-----------------------------|----------------|
| <i>FLT3</i>      | 28                             | 19                              | 9                           | 0.515          |
| <i>FLT3-ITD</i>  | 23                             | 16                              | 7                           | 0.327          |
| <i>DNMT3A</i>    | 24                             | 17                              | 7                           | 0.823          |
| <i>IDH2</i>      | 17                             | 11                              | 6                           | 0.358          |
| <i>TET2</i>      | 19                             | 13                              | 6                           | 0.267          |
| <i>NRAS/KRAS</i> | 14                             | 11                              | 3                           | 0.244          |
| <i>PTPN11</i>    | 9                              | 7                               | 2                           | 0.492          |
| <i>CEBPA</i>     | 7                              | 5                               | 2                           | 0.893          |
| <i>IDH1</i>      | 6                              | 4                               | 2                           | 1.000          |
| <i>SRSF2</i>     | 8                              | 6                               | 2                           | 0.913          |
| <i>WT1</i>       | 5                              | 2                               | 3                           | 0.025          |
| <i>ASXL1</i>     | 6                              | 4                               | 2                           | 1.000          |

*NPM1*, nucleophosmin 1; CNA, copy number alteration; CN-LOH, copy-neutral loss of heterozygosity; *FLT3-ITD*, fms-related receptor tyrosine kinase-internal tandem duplication; *DNMT3A*, DNA methyltransferase 3; *IDH1/2*, isocitrate dehydrogenase 1/2; *TET2*, tet methylcytosine dioxygenase 2; *PTPN11*, protein tyrosine phosphatase non-receptor type 11; *CEBPA*, CCAAT/enhancer-binding protein  $\alpha$ ; *SRSF2*, serine and arginine-rich splicing factor 2; *WT1*, Wilms tumor 1; *ASXL1*, additional sex combs-like 1.
